# Supplementary material
Source: PubMed Central journal article supplement (PMC3436270)
Supplement: supp_M112.376640_jbc.M112.376640-1.pdf [file supp_M112.376640_jbc.M112.376640-1.pdf]

# Figure S1

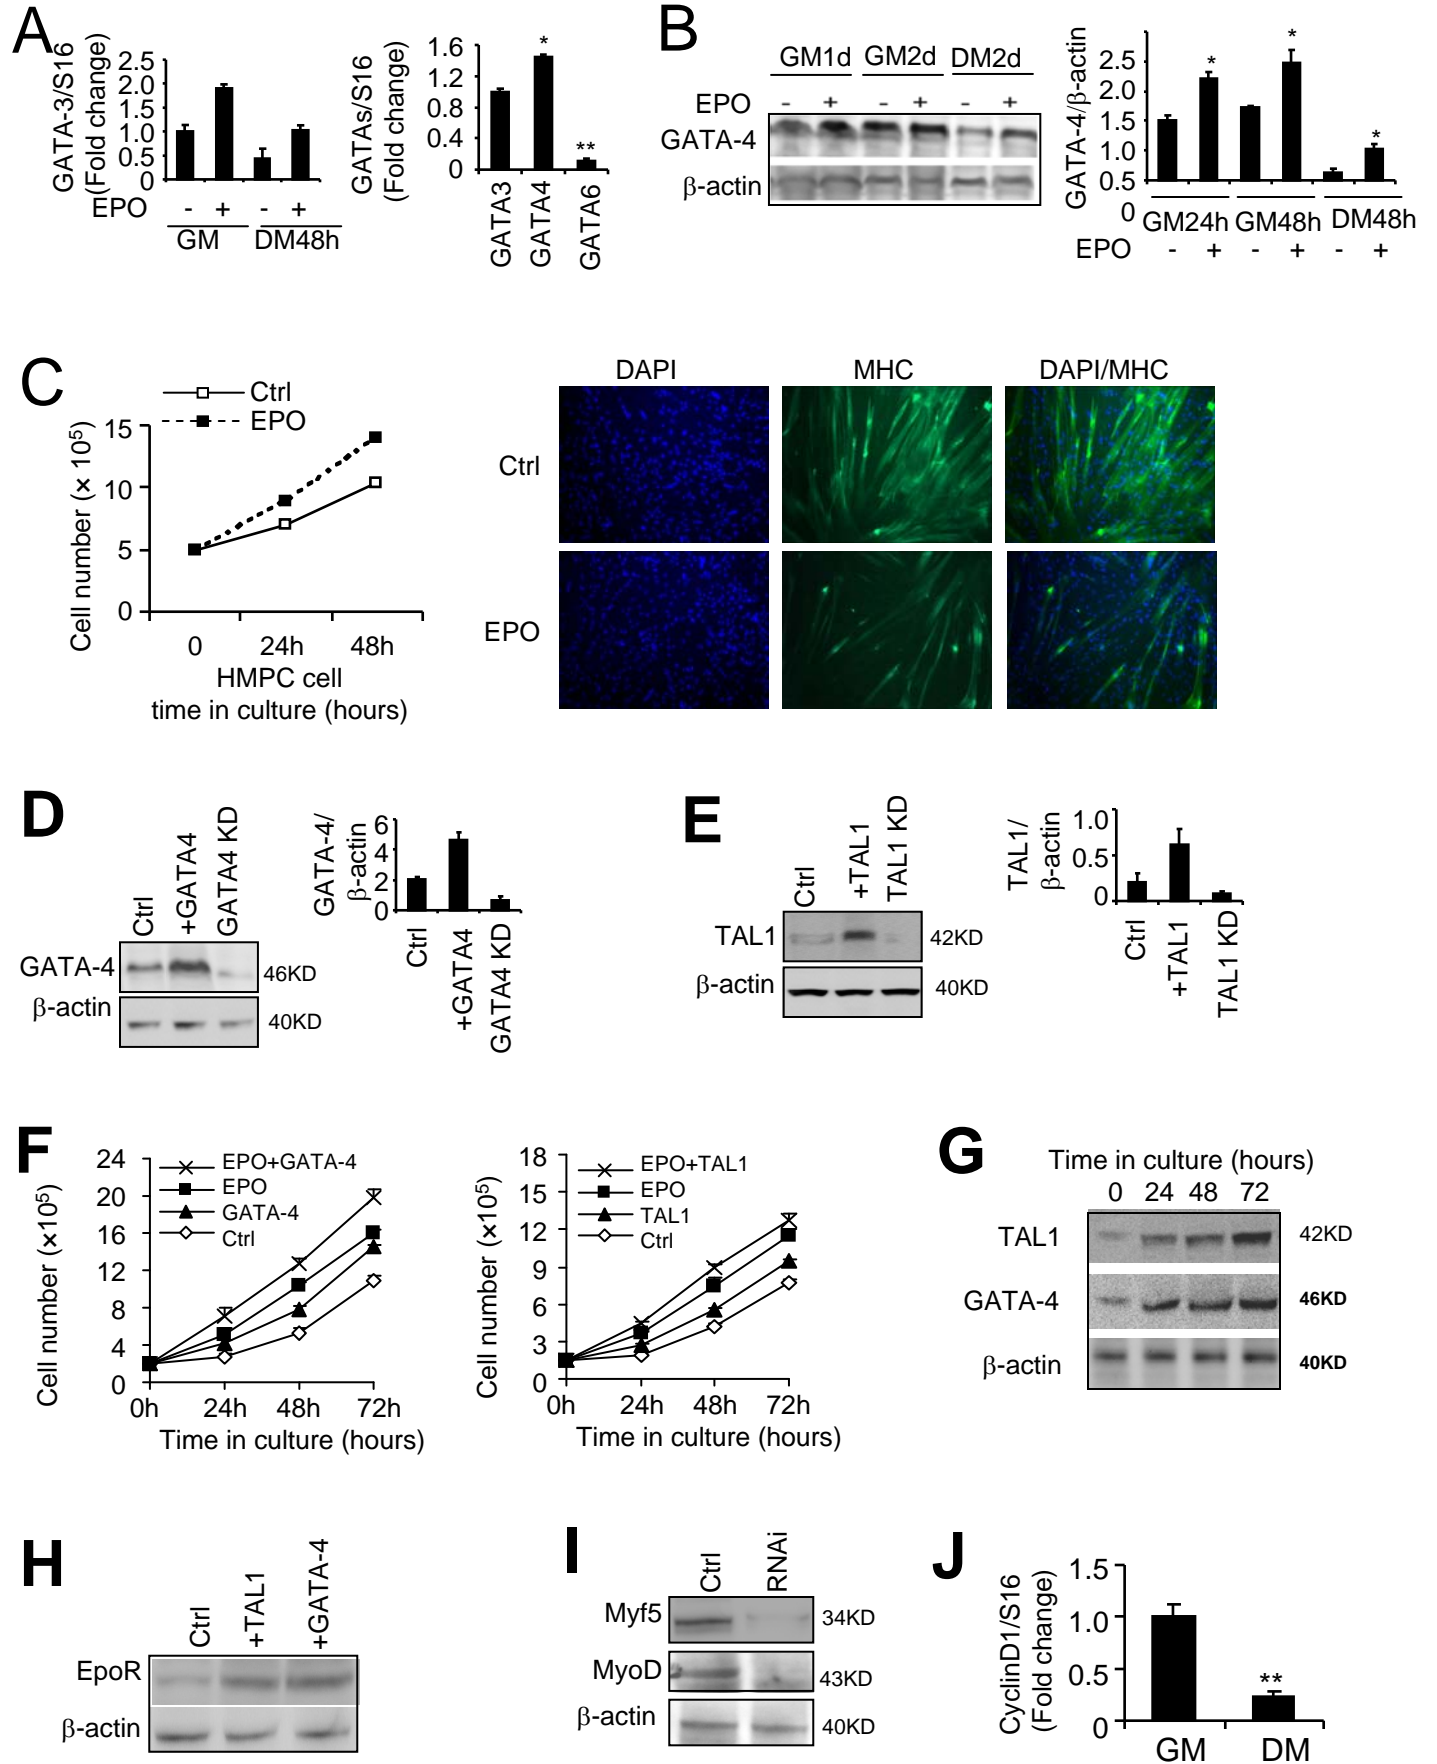

# Figure S2

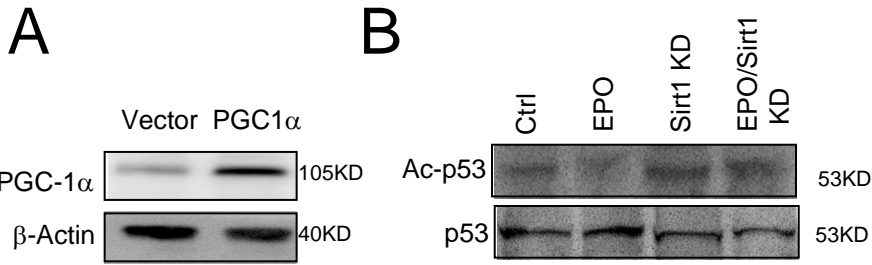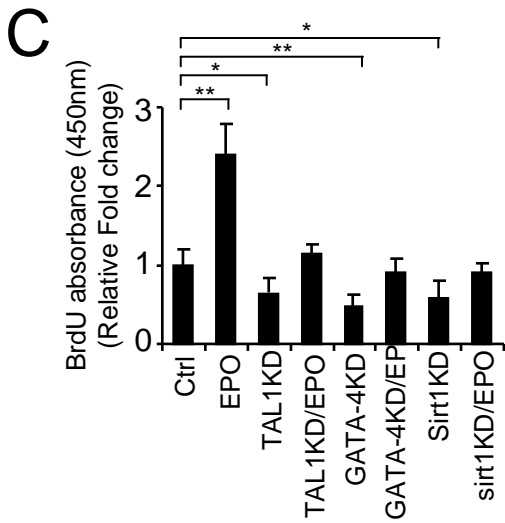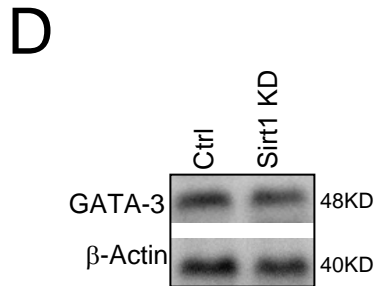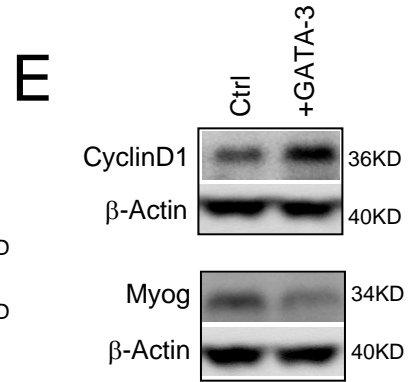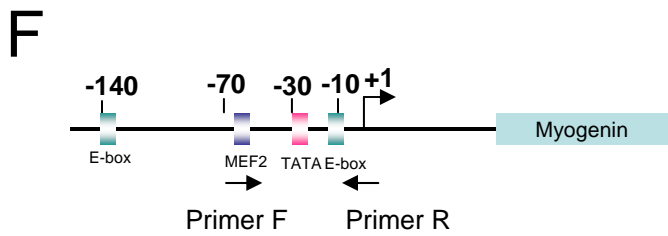

**Table S1 Primers for ChIP assays,**

| Primers        | Forward                 | Reverse               |
|----------------|-------------------------|-----------------------|
| Cyclin D1 prom | AGAACAGGGTGTCTTGCAC     | CGGACTGCTTCTCTCCAAAC  |
| EpoR prom      | AAGGGAACAGGGGCCTTCTT    | GGCACCCCTGAGTTTGTCCAT |
| TAL1 prom      | CAGATCCGTTAGAGGGTTCG    | CTGGGAATTACCTCGTGTGC  |
| GATA-4 prom    | TCCGCGGACTCACGGAGATC    | ACCAGAGCGGCTCCAGCGAA  |
| Myogenin prom  | TGGCTATATTTATCTCTGGGTTC | GCTCCCGCAGCCCCT       |

# Supplementary Figure Legends

## **Supplemental Figure S1. GATA factor and TAL1 expression and myoblast proliferation.**

A) GATA-3 expression level in C2C12 cultured in growth medium and differentiation medium without or with EPO treatment. GATA factor expression (GATA-3, GATA-4 and GATA-6) in C2C12 cells was determined using quantitative RT-PCR and normalized to S16. B) EPO induction of GATA-4 protein was evident in C2C12 cultures in growth medium (after 1 (GM1) and 2 (GM2) days) and in differentiation medium (after 2 days (DM2)) determined by Western blotting and normalized to  $\beta$ -actin. C) Primary human muscle precursor cells (HMPC) treated without (Ctrl; solid line) or with EPO (5U/ml; dashed line) were assessed by determination of cell number under growth conditions and by MHC staining following myoblast differentiation for 72 hours. D-E). GATA-4 (D) and TAL1 (E) proteins were assessed and quantified using Western blotting after overexpression (+) and knock down (KD) of GATA-4 (D) or TAL1 (E). F) Cell number was determined for C2C12 myoblasts cultured without (control (Ctrl); open diamonds), with GATA-4 (left) or TAL1 (right) over expression (triangles), with EPO treatment (squares) and with EPO treatment plus GATA-4 or TAL1 over expression (X) at times indicated. G) Overexpression of TAL1 and GATA-4 in C2C12 myoblasts were detected by Western blotting at times indicated. H) EpoR protein level was determined in C2C12 cells with overexpression TAL1 and GATA-4 (48h). I) Knocking down of Myf5 and MyoD was confirmed by Western blotting. J) CyclinD1 mRNA level was measured during myogenic differentiation after 2 days. The mean values from 3 experiments are shown. Error bars represent standard deviation; \* indicates  $p < 0.05$  and \*\* indicates  $p < 0.01$ .

**Supplemental Figure S2. EPO and protein acetylation.** A) Overexpression of PGC-1 $\alpha$  in C1C12 was confirmed by Western blotting. B) The P53 acetylation was determined in the C2C12 with EPO treatment or Sirt1 knocking down by Western blotting. Representative blots are shown. C). Cell proliferation was determined by BrdU cell absorption in C2C12 myoblasts with TAL1, GATA-4 and Sirt1 knock-down without or with EPO treatment. D). GATA-3 protein level was determined by Western blotting with knock down (KD) of Sirt1 in C2C12 cells. E). Cyclin D1 protein level was determined with overexpression of GATA-3 in C2C12 myoblasts cultured in growth medium and myogenin protein level was determined with overexpression of GATA-3 in C2C12 cultured in differentiation medium for 48h. F). The mouse Myogenin promoter consists of a TATA box and is flanked by activator sites (MEF2 and E-box). Arrowheads correspond to the region spanning the Myogenin promoter primer sequences used for analysis in the ChIP assay. \* indicates  $p < 0.05$ ; \*\* indicates  $p < 0.01$ ; \*\*\* indicates  $p < 0.001$ .

**Supplemental Table S1.** The ChIP primer pairs.
